# Supplementary material for: Divergent midbrain circuits orchestrate escape and freezing responses to looming stimuli in mice
Source: PubMed Central journal article supplement (PMC5964329; doi:10.1038/s41467-018-03580-7), 2018-03-26
Supplement: 41467_2018_3580_MOESM1_ESM.pdf [file 41467_2018_3580_MOESM1_ESM.pdf]

## **Supplementary Figures and Tables**

# **Divergent midbrain circuits orchestrate escape and freezing responses to looming stimuli in mice**

**Authors:** Congping Shang, Zijun Chen, Aixue Liu, Yang Li, Jiajing Zhang, Fei Yan, Baole Qu, Yaning Zhang, Weixiu Liu, Zihui Liu, Xiaofei Guo, Dapeng Li, Yi Wang, Peng Cao

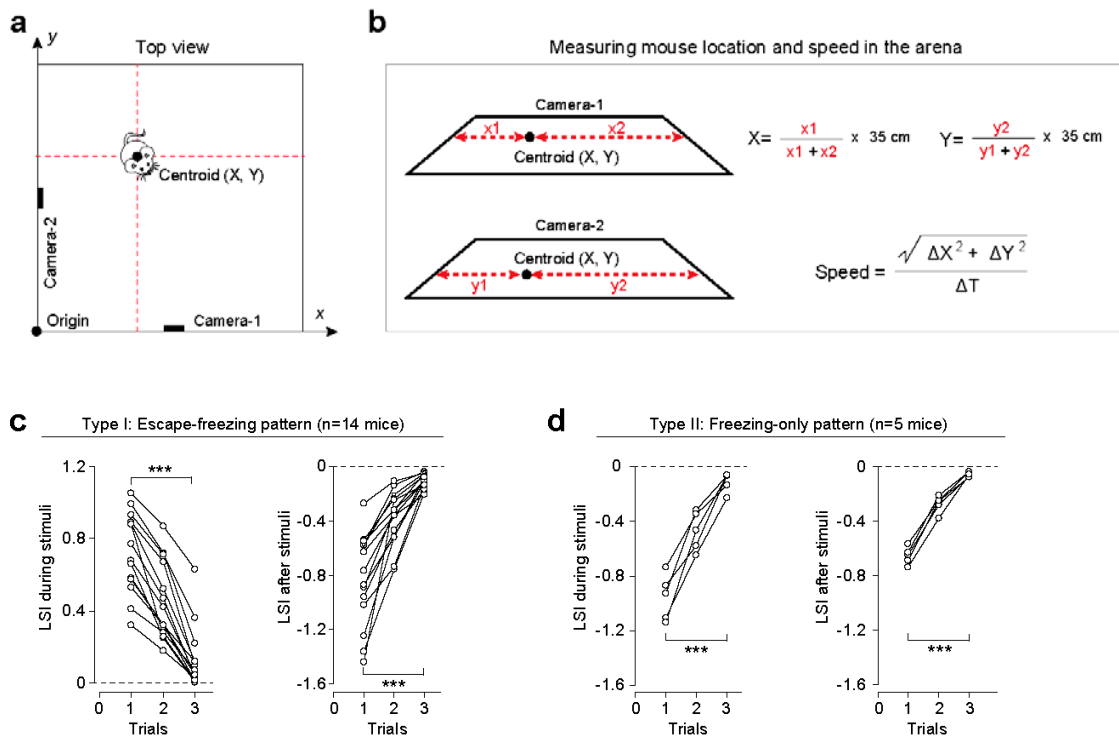

**Supplementary Figure 1 Quantitative analyses of mouse defensive behaviors triggered by looming visual stimuli. (a)** Schematic diagram showing the centroid of a mouse in the x-y coordinate of the behavioral arena. The mouse locomotion was monitored by two orthogonally positioned cameras (camera-1, camera-2). **(b)** Schematic diagram and mathematical formulae to measure mouse Location (X, Y) and Speed in the arena. For more information, see Methods (session "Behavioral tests"). **(c)** LSI<sub>during stimuli</sub> (*left*) and LSI<sub>after stimuli</sub> (*right*) of the same mice (n=14 mice) with type I defensive behavioral pattern to three trials of looming visual stimuli (1 trial per minute). **(d)** LSI<sub>during stimuli</sub> (*left*) and LSI<sub>after stimuli</sub> (*right*) of the same mice (n=5 mice) with type II defensive behavioral pattern to three trials of looming visual stimuli (1 trial per minute). Data points in (c, d) indicate each mouse. Statistical analysis in (c, d) was Student's *t* test (\*\*\*) P<0.001).

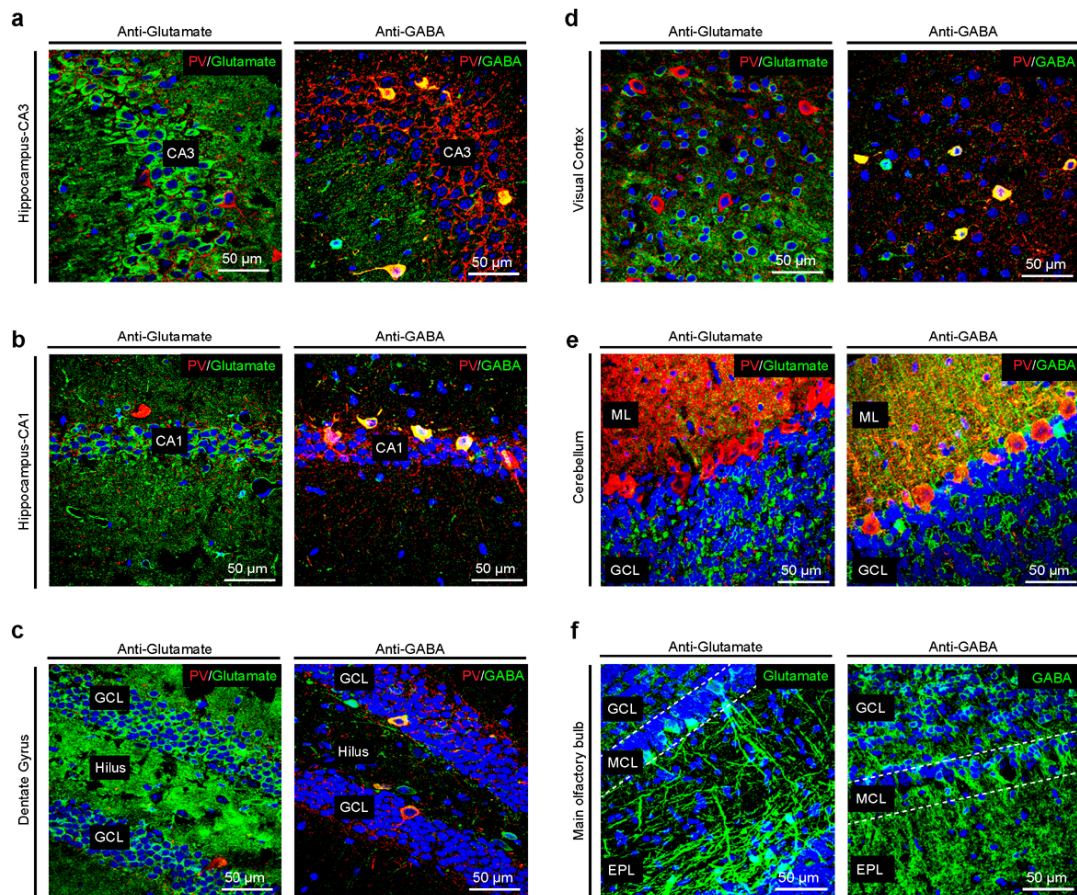

**Supplementary Figure 2 Anti-glutamate and anti-GABA antibodies validated by immunohistochemistry.** (a - e) Micrographs showing immunoreactivity of glutamate vs. PV (left column), and that of GABA vs. PV (right column) in the hippocampal CA3 (a), CA1 (b), dentate gyrus (c), visual cortex (d) and cerebellum (e). In the hippocampus (a-c), CA3/CA1 pyramidal neurons (a, b) and granule cells in the dentate gyrus (c) are labeled by anti-glutamate antibody but not by anti-GABA antibody, whereas PV<sup>+</sup> GABAergic neurons are labeled by anti-GABA antibody but not anti-glutamate antibody. In the visual cortex (d), cortical GABAergic PV<sup>+</sup> neurons are labeled by anti-GABA antibody but not by anti-glutamate antibody. In the cerebellum (e), PV<sup>+</sup> GABAergic Purkinje cells are labeled by anti-GABA antibody but not by anti-glutamate antibody. (f) In the olfactory bulb, anti-glutamate antibody labeled mitral cells in the mitral cell layer (MCL) and tufted cells in the external plexiform layer (EPL), without labeling granule cells in the granule cell layer (GCL). By contrast, anti-GABA antibody labeled massive granule cells in the GCL. These data suggest that the anti-glutamate and anti-GABA antibodies can reliably label glutamatergic and GABAergic neurons in mouse brain. Scale bars are indicated in the graphs.

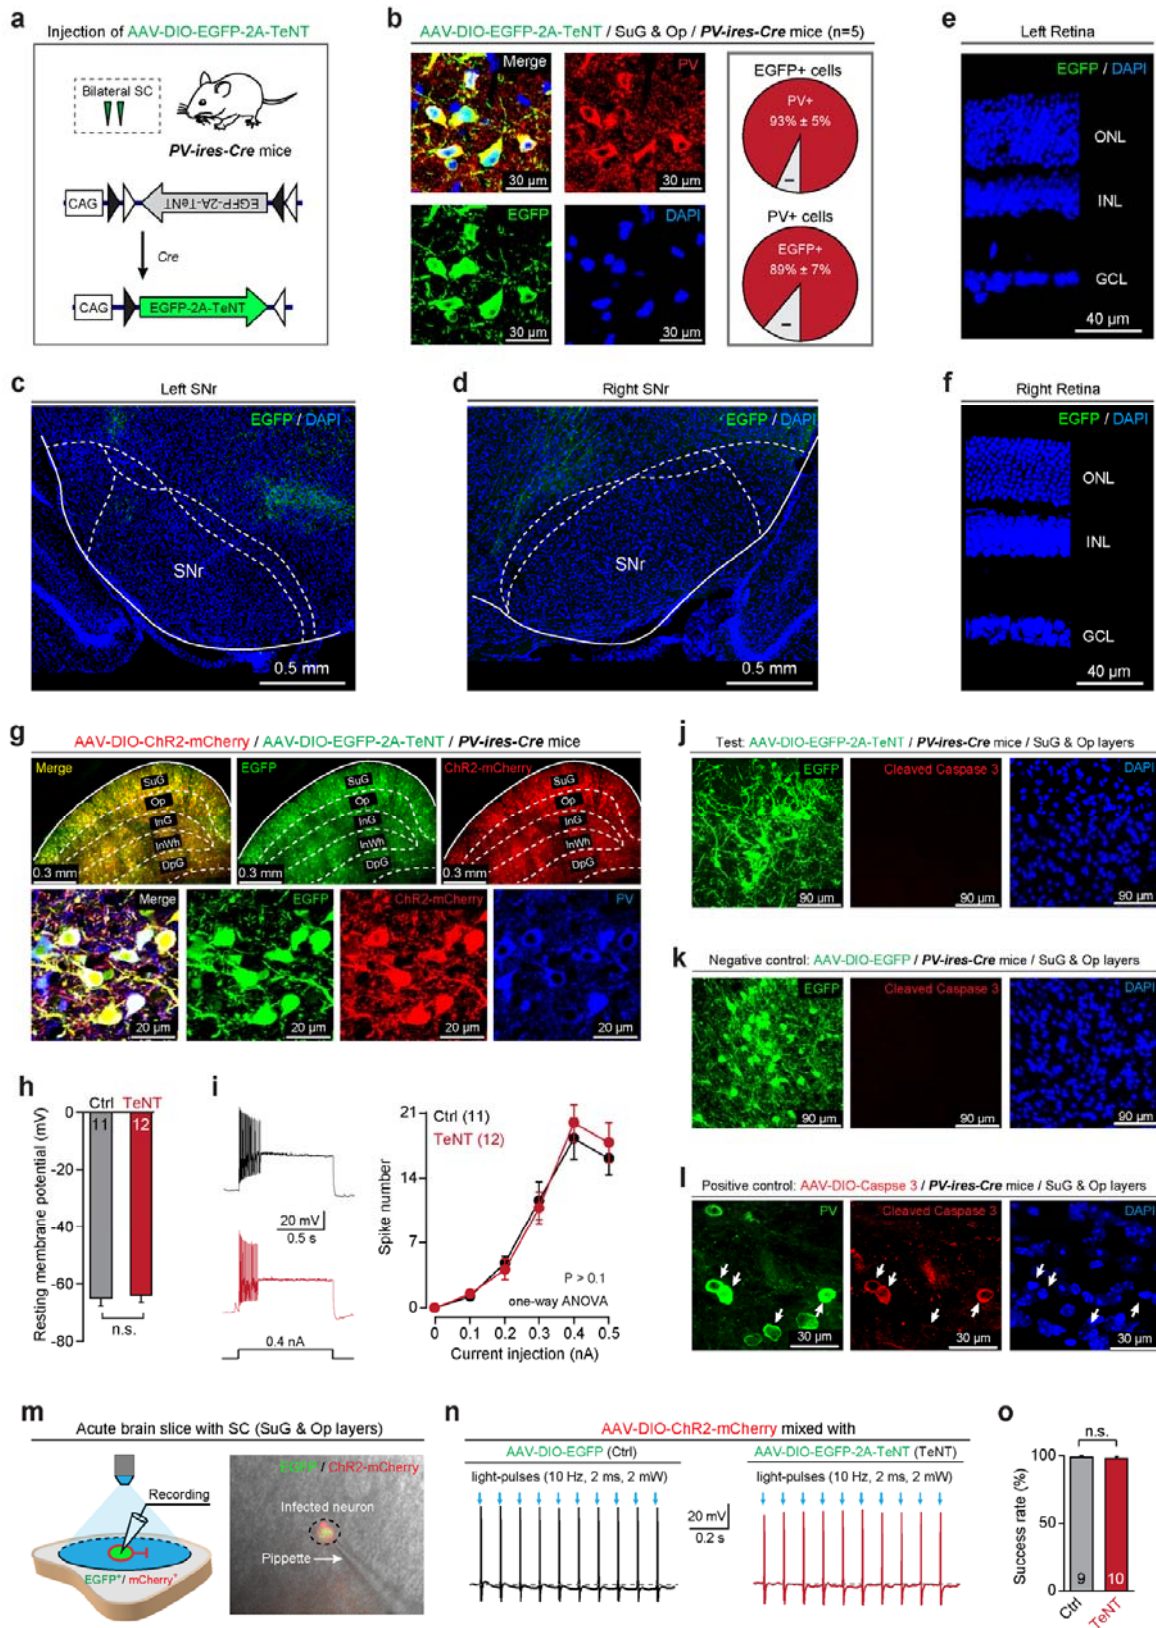

**Supplementary Figure 3 SC PV<sup>+</sup> neurons are essential for visually triggered dimorphic defensive behaviors.** (a) Schematic diagram showing injection of AAV-DIO-EGFP-2A-TeNT into the SC of *PV-ires-Cre* mouse line. (b) Example micrographs (left) and quantitative analyses (right) showing PV<sup>+</sup> neurons in the SuG and Op layers were reliably labeled by EGFP after AAV-DIO-EGFP-2A-TeNT injection into the SC of *PV-ires-Cre* mice (n=5). For cell counting strategy, see Methods and Supplementary Table 1. (c, d) Example brain tissue sections of left (c) and right SNr (d) showing no retrogradely infected cell bodies were labeled in the SNr. (e, f) Example sections of left (e) and right retina (f) showing no retrogradely infected cell bodies were labeled in the retina. (g) Coronal section of the SC (top) and the micrographs (bottom) showing SC PV<sup>+</sup> neurons co-labeled by EGFP and ChR2-mCherry after unilateral injection of AAV-DIO-EGFP-2A-TeNT and AAV-DIO-ChR2-mCherry mixture into the SC of *PV-ires-Cre* mice. (h) Quantitative analyses of the effect of TeNT expression on resting membrane potential of SC PV<sup>+</sup> neurons three weeks after AAV injection. (i) Quantitative analyses of the effect of TeNT expression on depolarization-induced action potential firing three weeks after AAV injection. (j-l) Example micrographs showing no apoptosis, as indicated by cleaved caspase 3, was observed three months after AAV-DIO-EGFP-2A-TeNT injection into the SC of *PV-ires-Cre* mice (j). Note (k) is a negative control for (j). In positive control experiment (l), AAV-DIO-Capase3 induced robust Cleaved Caspase 3 signal in SC PV<sup>+</sup> neurons, suggesting the antibody of Cleaved Caspase 3 works well. (m) Schematic diagram (*left*) and example microscopic image (right) showing recording of light-evoked spiking activity from SC PV<sup>+</sup> neurons infected by AAV-DIO-EGFP-2A-TeNT and AAV-DIO-ChR2-mCherry. The recorded neurons are co-infected and fluorescently positive for both EGFP and mCherry. (n) Example traces showing that light-pulse train (473 nm, 10 Hz, 2 ms, 2 mW) reliably evoked phase-locked spiking activity from SC PV<sup>+</sup> neurons expressing ChR2-mCherry, EGFP and TeNT. (o) Comparison of success rate to evoke action potential firing from ChR2-mCherry<sup>+</sup> neurons with (TeNT) or without TeNT (Ctrl). Data in (h, l, o) are means  $\pm$  SEM (error bars). Numbers of cells are indicated in the bars. Statistical analysis was Student's *t* test (h and o, n.s.  $P > 0.1$ ) and Two-way ANOVA (i).

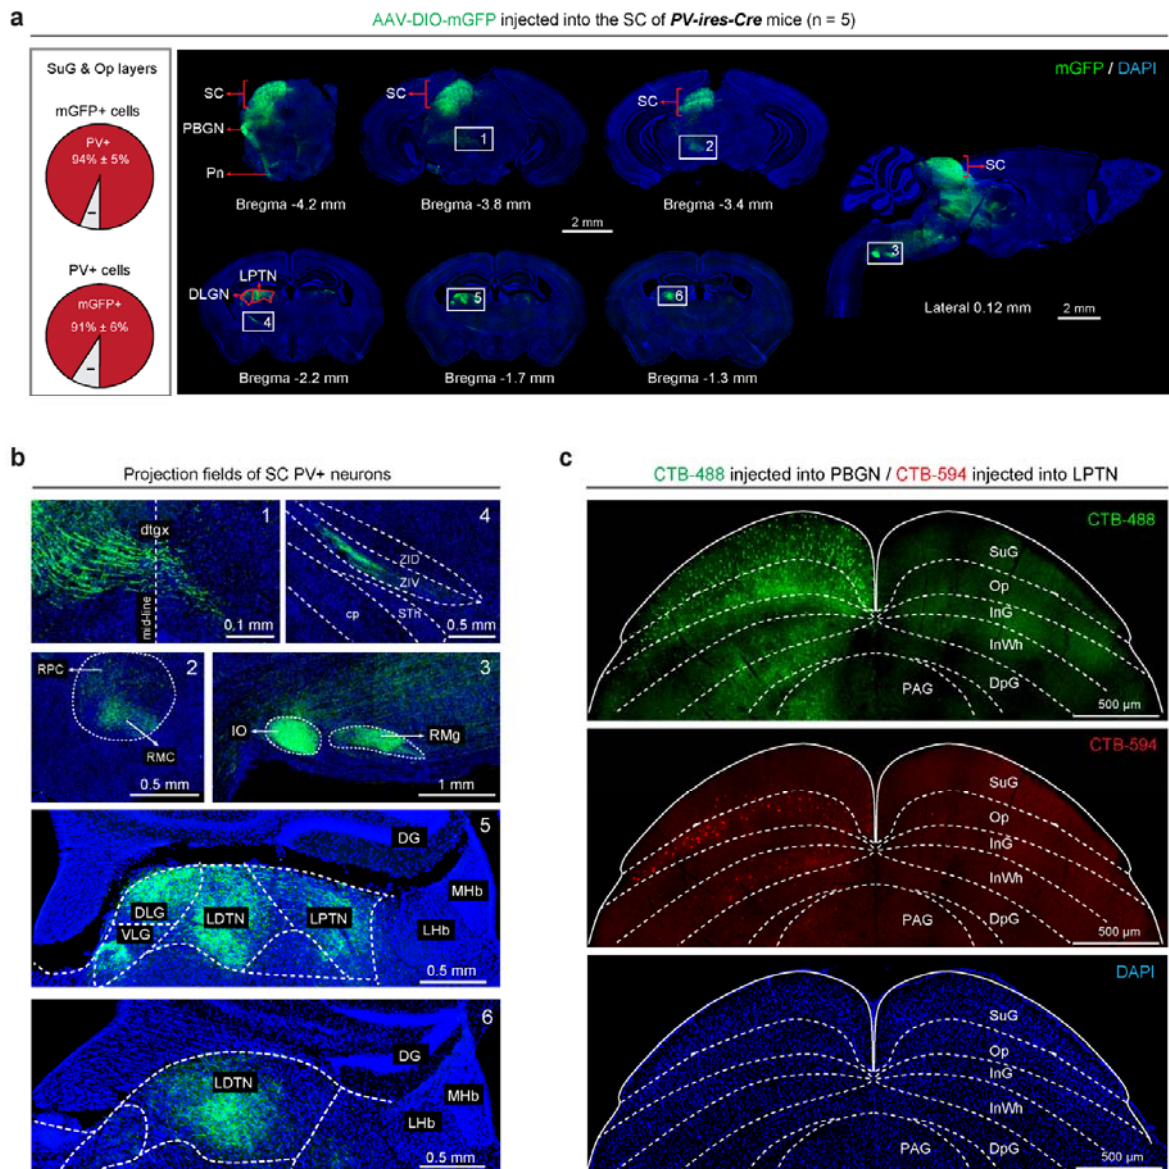

**Supplementary Figure 4 Brain-wide mapping of projections from SC PV<sup>+</sup> neurons.** (a) *Left*, quantitative analyses showing PV<sup>+</sup> neurons in the SuG and Op layers were reliably labeled by mGFP after AAV-DIO-mGFP injection into the SC of *PV-ires-Cre* mice. For cell counting strategy, see Methods and Supplementary Table 1. *Right*, coronal and sagittal sections showing SC PV<sup>+</sup> neurons labeled by mGFP project extensively to diverse brain regions. The cropped regions (1-6) are shown in (b). (b) Six micrographs of the magnified regions cropped in (a) showing the projection fields of the SC PV<sup>+</sup> neurons. Note axons of some SC PV<sup>+</sup> neurons crossed the brain midline at dtgx (region 1). Axons of some SC PV<sup>+</sup> neurons projected ipsilaterally to RPC/RMC (region 2), IO (region 3), RMg (region 3), ZIV (region 4), LPTN (region 5), DLG (region 5), VLG (region 5) and

LDTN (region 5 and 6). RPC, red nucleus, parvicellular part; RMC, red nucleus, magnocellular part; IO, inferior olive; RMg, Raphe magnus nucleus; ZIV, ventral zona incerta; LPTN, lateral posterior thalamic nucleus; DLG, dorsal lateral geniculate nucleus; VLG, ventral lateral geniculate nucleus; LDTN, lateral dorsal thalamic nucleus. **(c)** Three single-channel micrographs showing an example coronal section of the SC with retrogradely labeled cells projecting to the PBGN (CTB-488<sup>+</sup>, green) and LPTN (CTB-594<sup>+</sup>, red). Scale bars are indicated in each panel. Data in (a, left) are means  $\pm$  SEM (error bars).

**a** AAV-DIO-GCaMP6m / SuG & Op layers of the SC / PV-ires-Cre mice (n = 5)

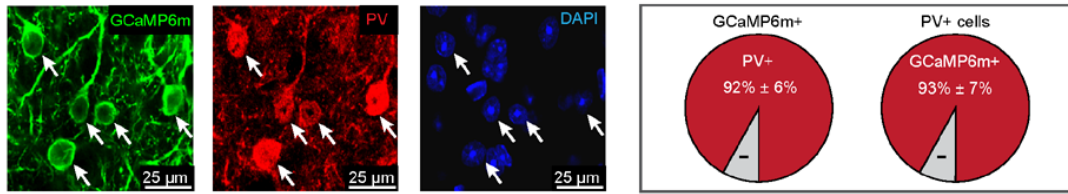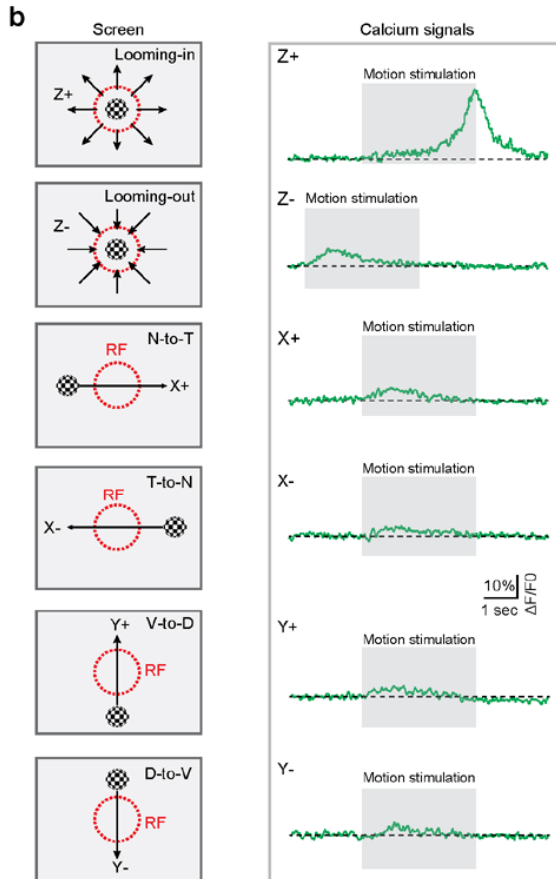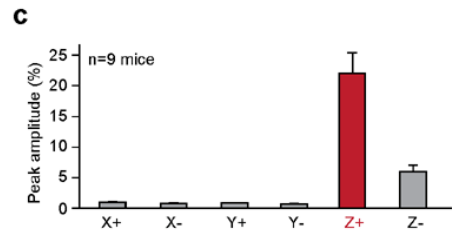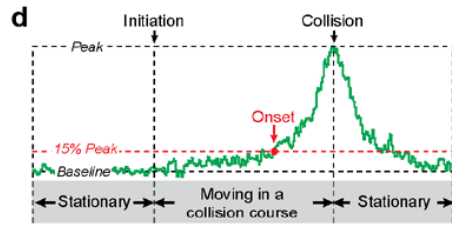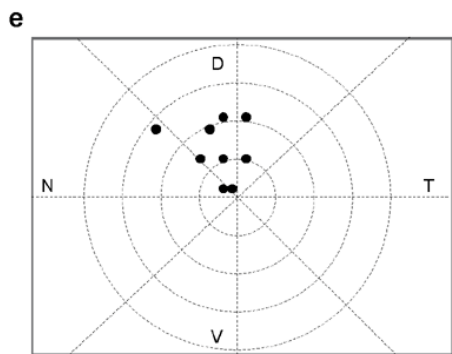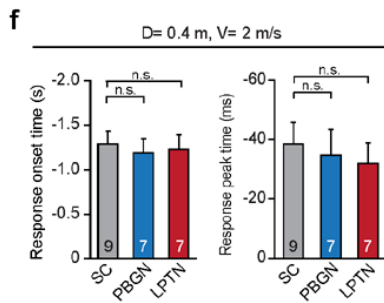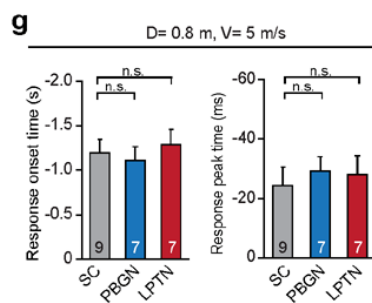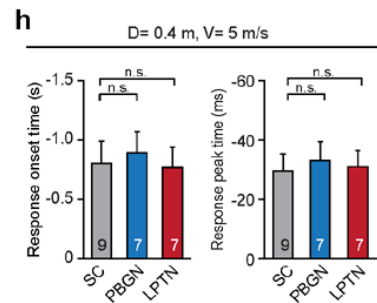



**Supplementary Figure 5 Recording of visually evoked  $\text{Ca}^{2+}$  transients from SC  $\text{PV}^+$  neurons expressing GCaMP6m.** (a) Single-channel micrographs (left) and quantitative analyses (right) showing  $\text{PV}^+$  neurons in the SuG and Op layers were reliably labeled by GCaMP6m after AAV-DIO-GCaMP6m injection into the SC of *PV-ires-Cre* mice. Arrows indicate  $\text{PV}^+$  neurons labeled by GCaMP6m. For cell counting strategy, see Methods and Supplementary Table 1. (b) Schematic diagram showing the motion patterns of the soccer ball on the screen (left column) and example traces of  $\text{Ca}^{2+}$  transients (right column) recorded from a group of  $\text{PV}^+$  neurons in the medial SC in response to these visual stimuli. (c) Averaged peak amplitude ( $\Delta F/F_0$ ) of  $\text{Ca}^{2+}$  responses of SC  $\text{PV}^+$  neurons to the soccer ball moving in six directions ( $n = 9$  mice). (d) Schematic diagram showing how to measure the onset of  $\text{Ca}^{2+}$  responses of SC  $\text{PV}^+$  neurons to looming visual stimuli. The response onset is defined as the time point when the  $\text{Ca}^{2+}$  signal reaches 15% of peak amplitude in response to looming visual stimuli. (e) Distribution of receptive field centers of recorded SC  $\text{PV}^+$  neurons in the 9 mice. (f, g, h) Response onset time (*left*) and response peak time (*right*) of SC  $\text{PV}^+$  neurons or their axon terminals in the PBGN or LPTN to the virtual looming soccer ball with different combinations of diameter and velocity. Data in (a, c, f, g, h) are means  $\pm$  SEM (error bars). Numbers of mice are indicated in the graphs.

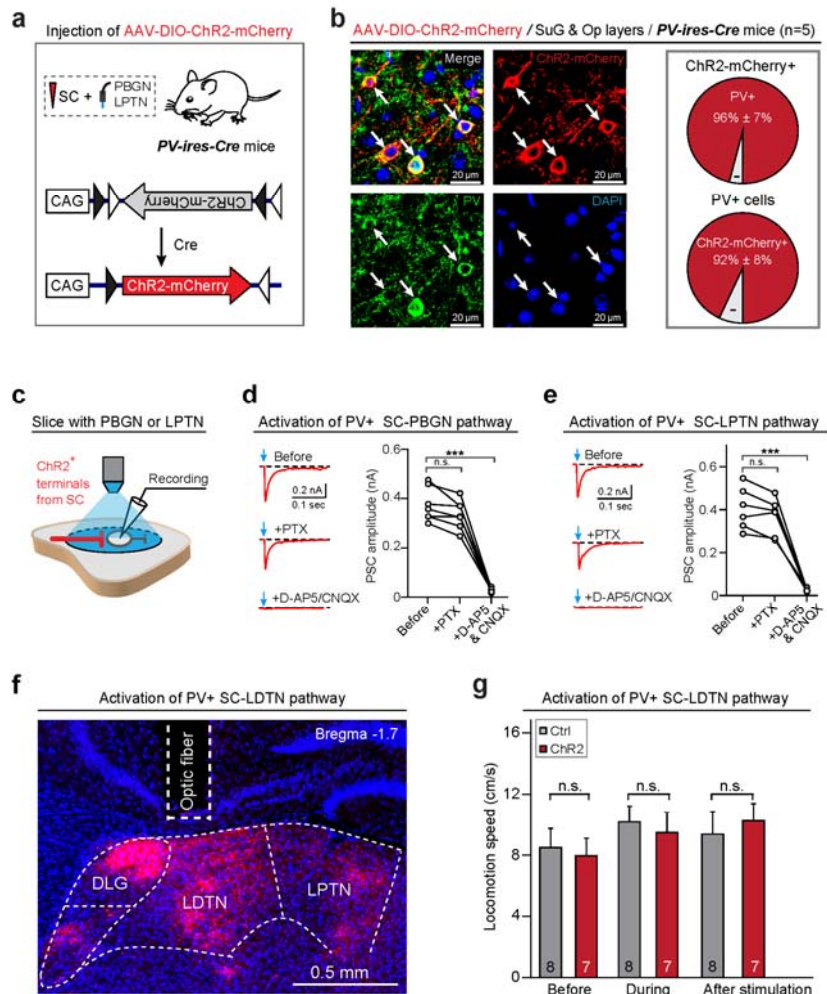

**Supplementary Figure 6 Activation of PV<sup>+</sup> SC-LPTN and PV<sup>+</sup> SC-PBGN pathways mimicked dimorphic defensive behavioral patterns.** (a) Schematic diagram showing injection of AAV-DIO-ChR2-mCherry into the SC of *PV-ires-Cre* mice followed by optic fiber implantation above the PBGN or LPTN. (b) Example micrographs (left) and quantitative analyses (right) showing PV<sup>+</sup> neurons in the SuG and Op layers were reliably labeled by ChR2-mCherry after AAV-DIO-ChR2-mCherry injection into the SC of *PV-ires-Cre* mice. For cell counting strategy, see Methods and Supplementary Table 1. (c) Schematic diagram of slice physiology showing whole-cell recording of light-evoked PSCs (473 nm, 1 ms, 20 mW) from PBGN or LPTN neurons innervated by ChR2<sup>+</sup> axon terminals from SC PV<sup>+</sup> neurons. (d, e) Effects of PTX and D-AP5/CNQX on light-evoked PSCs recorded from PBGN (d) and LPTN neurons (e). (f, g) Example coronal section with optic fiber track above LDTN (f) and average speed before, during, and after activation of PV<sup>+</sup> SC-LDTN pathway (g). Data in (b, g) are means  $\pm$  SEM (error bars). Numbers of mice are indicated in the graphs. Statistical analysis was Student's *t* test (\*\**P* < 0.001; n.s. *P* > 0.1).

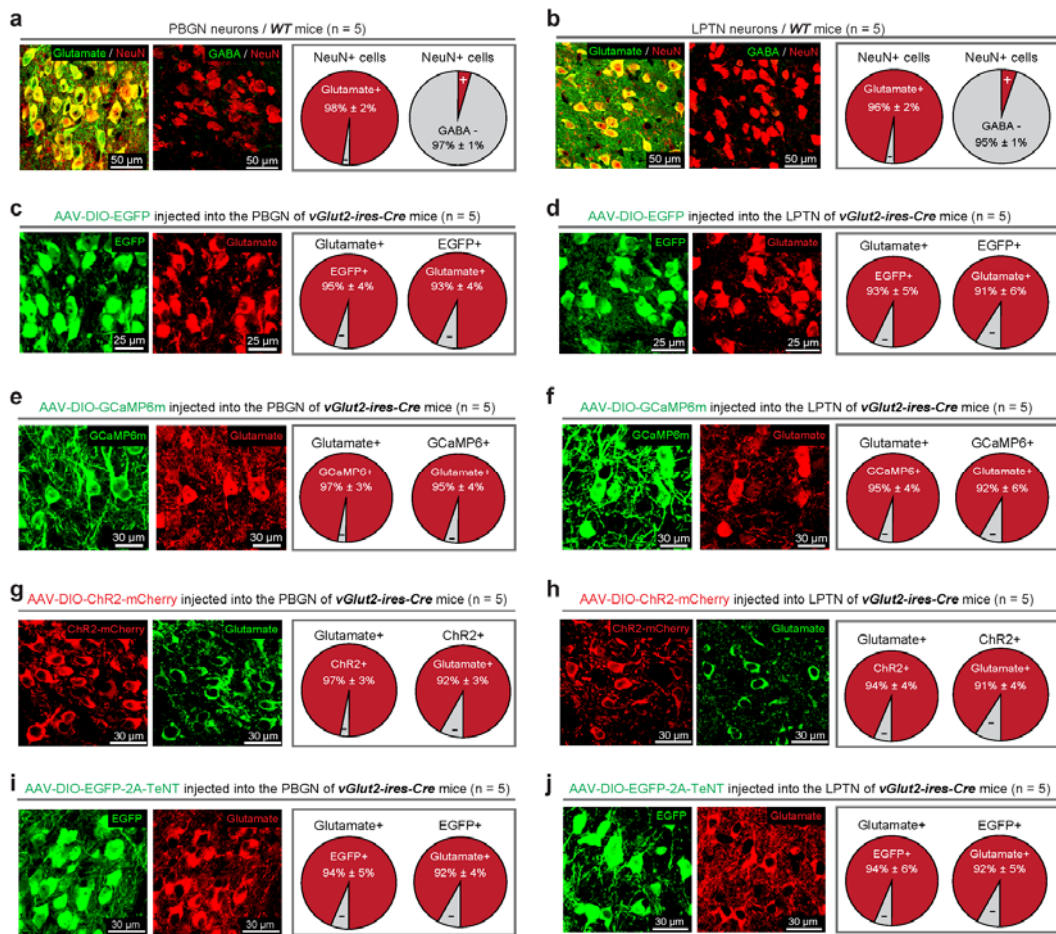

**Supplementary Figure 7 Analyses of neuronal types in the PBGN and LPTN.** (a, b) Example micrographs (left) and quantitative analyses (right) showing neurons (NeuN<sup>+</sup>) in the PBGN (a) and LPTN (b) of WT mice are predominantly glutamate<sup>+</sup> but not GABA<sup>+</sup>. (c, d) Example micrographs (left) and quantitative analyses (right) showing glutamate<sup>+</sup> neurons in the PBGN (c) and LPTN (d) were reliably labeled by EGFP after AAV-DIO-EGFP injection into the PBGN and LPTN of *vGlut2-ires-Cre* mice. (e, f) Example micrographs (left) and quantitative analyses (right) showing glutamate<sup>+</sup> neurons in the PBGN (e) and LPTN (f) were reliably labeled by GCaMP6m after AAV-DIO-GCaMP6m injection into the PBGN and LPTN of *vGlut2-ires-Cre* mice. (g, h) Example micrographs (left) and quantitative analyses (right) showing glutamate<sup>+</sup> neurons in the PBGN (g) and LPTN (h) were reliably labeled by ChR2-mCherry after AAV-DIO-ChR2-mCherry injection into the PBGN and LPTN of *vGlut2-ires-Cre* mice. (i, j) Example micrographs (left) and quantitative analyses (right) showing glutamate<sup>+</sup> neurons in the PBGN (i) and LPTN (j) were reliably labeled by EGFP after AAV-DIO-EGFP-2A-TeNT injection into the PBGN and LPTN of *vGlut2-ires-Cre* mice. Data in (a-j) are means ± SEM (error bars). Numbers of mice are indicated in the graphs. For cell counting strategy, see Methods and Supplementary Table 1.

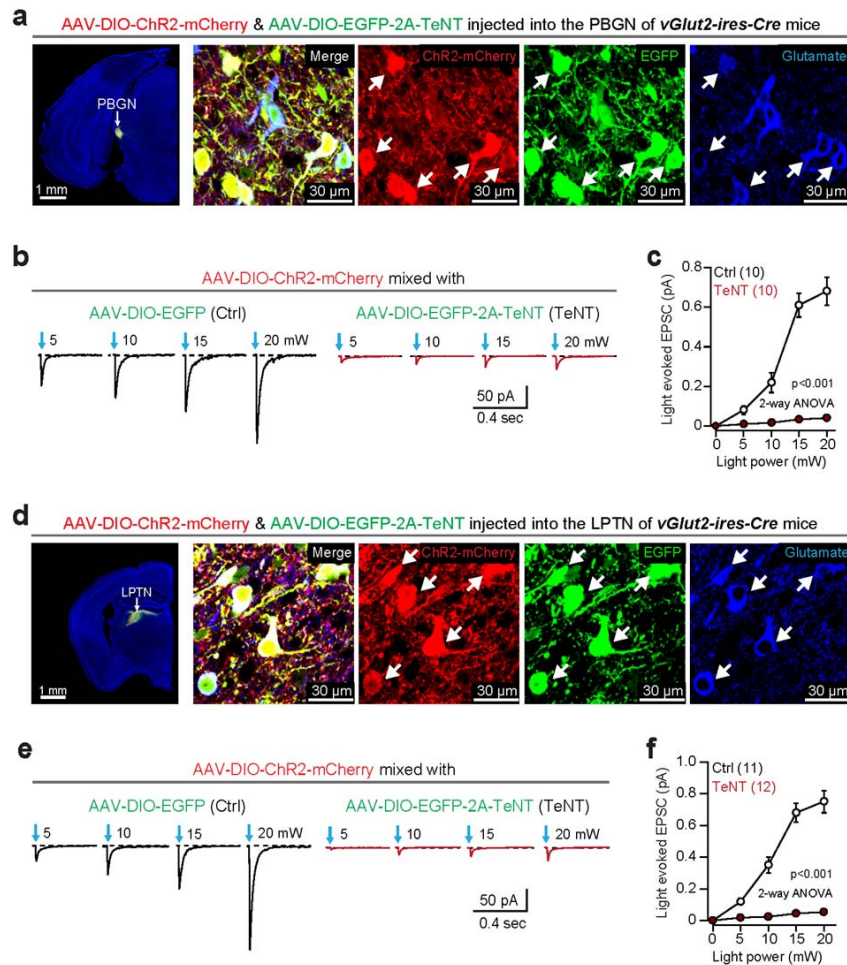

**Supplementary Figure 8 Synaptic inactivation of glutamatergic neurons in the PBGN and LPTN.** (a, d) A mixture of AAV-DIO-ChR2-mCherry and AAV-DIO-EGFP-2A-TeNT was injected into the PBGN (a, left) and LPTN (d, left) of *vGlut2-ires-Cre* mice, resulting in the co-expression of ChR2-mCherry and EGFP in glutamate<sup>+</sup> neurons in the PBGN (a, right) and LPTN (d, right). (b, c, e, f) Example traces (b, e) and input-output curves (c, f) of light-evoked excitatory PSC from ChR2-mCherry-negative neurons in the PBGN (b, c) and LPTN (e, f). Data in (c, f) are means  $\pm$  SEM (error bars). Numbers of cells are indicated in the graphs. Statistical analysis was Two-way ANOVA. Scale bars are indicated in the graphs. Arrows indicate glutamatergic neurons labeled by both ChR2-mCherry and EGFP.

**Supplementary Table 1 Summary of Cell Counting Strategy**

| Brain region          | SuG & Op layers of the SC                                                                                                | PBGN                                                                                                | LPTN                                                                                                   |
|-----------------------|--------------------------------------------------------------------------------------------------------------------------|-----------------------------------------------------------------------------------------------------|--------------------------------------------------------------------------------------------------------|
| Section type          | Coronal                                                                                                                  | Coronal                                                                                             | Coronal                                                                                                |
| Section Range         | Bregma (-3.28 to -4.48)                                                                                                  | Bregma (-4.16 to -4.36)                                                                             | Bregma (-1.82 to -2.80)                                                                                |
| Total collection      | Approximately 30 sections                                                                                                | Approximately 5 sections                                                                            | Approximately 25 sections                                                                              |
| Sampling              | 6 sections evenly spaced by 200 $\mu$ m                                                                                  | All the 5 sections                                                                                  | 5 sections evenly spaced by 200 $\mu$ m                                                                |
| Histological Analyses | PV vs. Glutamate<br>PV vs. GABA<br><b>WT</b> mice (n = 5)                                                                | Glutamate vs. NeuN<br>GABA vs. NeuN<br><b>WT</b> mice (n = 5)                                       | Glutamate vs. NeuN<br>GABA vs. NeuN<br><b>WT</b> mice (n = 5)                                          |
|                       | PV vs. mGFP<br><b>PV-ires-Cre</b> mice (n = 5)<br>inject AAV-DIO-mGFP                                                    | Glutamate vs. EGFP<br><b>vGlut2-ires-Cre</b> mice (n = 5)<br>inject AAV-DIO-EGFP                    | Glutamate vs. EGFP<br><b>vGlut2-ires-Cre</b> mice (n = 5)<br>inject AAV-DIO-EGFP                       |
|                       | PV vs. GCaMP6<br><b>PV-ires-Cre</b> mice (n = 5)<br>Inject AAV-DIO-GCaMP6                                                | Glutamate vs. GCaMP6<br><b>vGlut2-ires-Cre</b> mice (n = 5)<br>inject AAV-DIO-GCaMP6                | Glutamate vs. GCaMP6<br><b>vGlut2-ires-Cre</b> mice (n = 5)<br>inject AAV-DIO-GCaMP6                   |
|                       | PV vs. Chr2-mCherry<br><b>PV-ires-Cre</b> mice (n = 5)<br>inject AAV-DIO-ChR2mCherry                                     | Glutamate vs. Chr2-mCherry<br><b>vGlut2-ires-Cre</b> mice (n = 5)<br>inject AAV-DIO-ChR2mCherry     | Glutamate vs.<br>Chr2-mCherry<br><b>vGlut2-ires-Cre</b> mice (n = 5)<br>inject<br>AAV-DIO-ChR2-mCherry |
|                       | PV vs. EGFP-2A-TeNT<br><b>PV-ires-Cre</b> mice (n = 5)<br>Inject AAV-DIO-EGFP-2A-TeNT                                    | Glutamate vs. EGFP-2A-TeNT<br><b>vGlut2-ires-Cre</b> mice (n = 5)<br>inject<br>AAV-DIO-EGFP-2A-TeNT | Glutamate vs.<br>EGFP-2A-TeNT<br><b>vGlut2-ires-Cre</b> mice (n = 5)<br>inject<br>AAV-DIO-EGFP-2A-TeNT |
|                       | PV vs. CTB-488 and -594<br>CTB-488 injected into the PBGN<br>CTB-594 injected into the LPTN<br>of <b>WT</b> mice (n = 3) | N.A.                                                                                                | N.A.                                                                                                   |

**Supplementary Table 2 AAV injection, optic fiber implantation & CTB injection**

| Brain Regions               | SC                                                                                                                            | PBGN                                                                             | LPTN                                                                             |
|-----------------------------|-------------------------------------------------------------------------------------------------------------------------------|----------------------------------------------------------------------------------|----------------------------------------------------------------------------------|
| AAV-DIO-EGFP-2A-TeNT        | Bilateral injections ( <b>Figure 2</b> )<br>SC: B -3.8, L $\pm$ 0.5, D -1.0                                                   | Bilateral injections ( <b>Figure 8</b> )<br>PBGN: B -4.25, L $\pm$ 1.95, D -2.60 | Bilateral injections ( <b>Figure 8</b> )<br>LPTN: B -2.06, L $\pm$ 1.35, D -2.40 |
| AAV-DIO-mGFP                | Unilateral injection ( <b>Figure 3</b> )<br>SC: B -3.8, L $\pm$ 0.5, D -1.0                                                   | N.A.<br>N.A.                                                                     | N.A.<br>N.A.                                                                     |
| AAV-DIO-EGFP                | N.A.<br>N.A.                                                                                                                  | Unilateral injection ( <b>Figure 6</b> )<br>PBGN: B -4.25, L +1.95, D -2.60      | Unilateral injection ( <b>Figure 6</b> )<br>LPTN: B -2.06, L +1.35, D -2.40      |
| AAV-DIO-GCaMP6              | Unilateral injection ( <b>Figure 4</b> )<br>SC: B-3.80, L+0.50, D-1.00                                                        | Unilateral injection ( <b>Figure 6</b> )<br>PBGN: B -4.25, L +1.95, D -2.60      | Unilateral injection ( <b>Figure 6</b> )<br>LPTN: B -2.06, L +1.35, D -2.40      |
|                             | Ipsilateral implantation<br>SC: B-3.80, L+0.50, D -0.50<br>PBGN: B-4.25, L+1.95,<br>D-2.50<br>LPTN: B-2.06, L+1.35,<br>D-2.20 | Ipsilateral implantation<br>PBGN: B -4.25, L +1.95, D -2.50                      | Ipsilateral implantation<br>LPTN: B -2.06, L +1.35, D -2.20                      |
| AAV-DIO-ChR2-mCherry        | Unilateral injection ( <b>Figure 5</b> )<br>SC: B -3.80, L +0.50, D -1.00                                                     | Unilateral injection ( <b>Figure 7</b> )<br>PBGN: AP -4.25, L +1.95, D -2.60     | Unilateral injection ( <b>Figure 7</b> )<br>LPTN: B -2.06, L +1.35, D -2.40      |
|                             | Ipsilateral implantation<br>PBGN: B-4.25, L+1.95,<br>D-2.50<br>LPTN: B-2.06, L+1.35, D-2.20<br>LDTN: B-1.20, L+1.00, D-2.00   | Ipsilateral implantation<br>PBGN: AP -4.25, L +1.95, D -2.50                     | Ipsilateral implantation<br>LPTN: B -2.06, L +1.35, D -2.20                      |
| AAV-DIO-EGFP-2A<br>-NaChBac | N.A.<br>N.A.                                                                                                                  | Bilateral injections ( <b>Figure 9</b> )<br>PBGN: B -4.25, L $\pm$ 1.95, D -2.60 | Bilateral injections ( <b>Figure 9</b> )<br>LPTN: B-2.06, L $\pm$ 1.35, D-2.40   |
| CTB-488                     | N.A.<br>N.A.                                                                                                                  | Unilateral injection ( <b>Figure 3</b> )<br>PBGN: AP-4.25, L +1.95, D -2.60      | N.A.<br>N.A.                                                                     |
| CTB-594                     | N.A.<br>N.A.                                                                                                                  | N.A.<br>N.A.                                                                     | Unilateral injection ( <b>Figure 3</b> )<br>LPTN: B-2.06, L+1.35, D-2.40         |

**Supplementary Table 3: Summary of reagents and mouse lines**

|                              |                      |                  |
|------------------------------|----------------------|------------------|
| <b>Antibodies</b>            |                      |                  |
| Anti-EGFP                    | Abcam                | ab290            |
| Anti-parvalbumin             | Millipore            | MAB1572          |
| Anti-glutamate               | Sigma                | G6642            |
| Anti-GABA                    | Sigma                | A2052            |
| Anti-NeuN                    | Millipore            | MAB377           |
| <b>Mouse lines</b>           |                      |                  |
| <i>PV-ires-Cre</i>           | JAX Mice             | Stock No: 008069 |
| <i>vGlut2-ires-Cre</i>       | JAX Mice             | Stock No: 028863 |
| <b>Chemicals and tracers</b> |                      |                  |
| D-AP5                        | Tocris               | Cat. No. 0106    |
| CNQX                         | Tocris               | Cat. No. 0190    |
| Picrotoxin                   | Tocris               | Cat. No. 1128    |
| TTX                          | Tocris               | Cat. No. 1078    |
| 4-AP                         | Sigma                | Cat. No. 275875  |
| CTB-594                      | Thermo-Fisher        | Cat. No. C22842  |
| CTB-488                      | Thermo-Fisher        | Cat. No. C34775  |
| <b>AAV vectors</b>           |                      |                  |
| AAV-DIO-EGFP-2A-TeNT         | Stanford Vector Core | N.A.             |
| AAV-DIO-EGFP                 | Stanford Vector Core | N.A.             |
| AAV-DIO-mGFP                 | Stanford Vector Core | N.A.             |
| AAV-DIO-ChR2-mCherry         | Stanford Vector Core | N.A.             |
| AAV-DIO-mCherry              | Stanford Vector Core | N.A.             |
| AAV-DIO-GCaMP6m              | Stanford Vector Core | N.A.             |
| AAV-DIO-EGFP-2A-N aChBac     | Stanford Vector Core | N.A.             |
