# Supplementary material for: Divergent midbrain circuits orchestrate escape and freezing responses to looming stimuli in mice
Source: PubMed Central journal article supplement (PMC5964329; doi:10.1038/s41467-018-03580-7), 2018-03-26
Supplement: 41467_2018_3580_MOESM3_ESM.pdf [file 41467_2018_3580_MOESM3_ESM.pdf]

## **Description of Additional Supplementary Files**

File Name: Supplementary Movie 1

Description: Example of type I defensive behavior in wild-type mice.

File Name: Supplementary Movie 2

Description: Example of type II defensive behavior in wild-type mice.

File Name: Supplementary Movie 3

Description: Effects of synaptic inactivation of SC PV+ neurons on visually triggered defensive behaviour.

File Name: Supplementary Movie 4

Description: Defensive behaviors triggered by optogenetic activation of PV+ SC-PBGN and SC-LPTN pathways.

File Name: Supplementary Movie 5

Description: Fiber photometry recording of glutamatergic PBGN neurons during defensive behaviors in a freely moving mouse.

File Name: Supplementary Movie 6

Description: Fiber photometry recording of glutamatergic LPTN neurons during defensive behaviors in a freely moving mouse.

File Name: Supplementary Movie 7

Description: Defensive behaviors triggered by optogenetic activation of glutamatergic PBGN neurons and LPTN neurons.

File Name: Supplementary Movie 8

Description: Effects of synaptic inactivation of glutamatergic PBGN neurons on visually triggered defensive behavior.

File Name: Supplementary Movie 9

Description: Effects of synaptic inactivation of glutamatergic LPTN neurons on visually triggered defensive behavior.
